# Supplementary material for: A water-mediated approach for the preparation of conductive poly(3,4-ethylenedioxythiophene)-decorated poly(methyl methacrylate) microcomposites
Source: Royal Society of Chemistry journal article supplement (doi:10.1039/d2ma00027j), 2022-01-01
Supplement: d2ma00027j1.pdf [file d2ma00027j1.pdf]

# A water mediated approach for the preparation of conductive Poly (3,4-ethylenedioxythiophene) decorated poly (methyl methacrylate) microcomposites

Saeed P A<sup>a</sup>, Shilpa R<sup>b</sup>, and Sujith A<sup>\*a</sup>

## Supporting Information

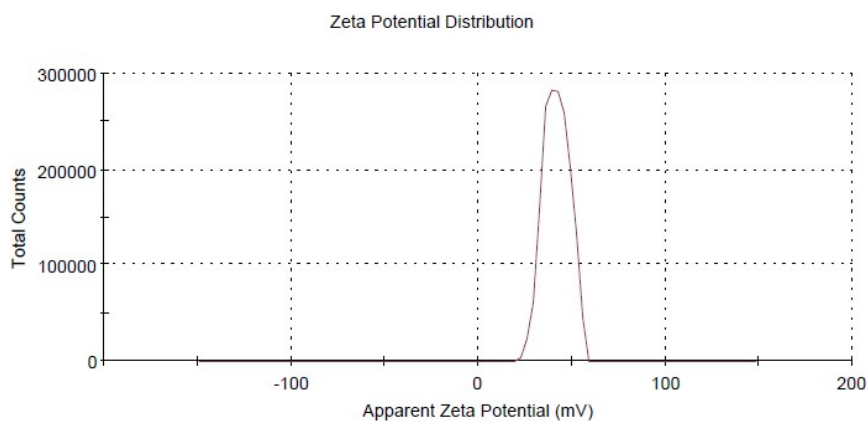

Figure S1. Zeta potential distribution of PMMA latex prepared by surfactant free emulsion polymerization

---

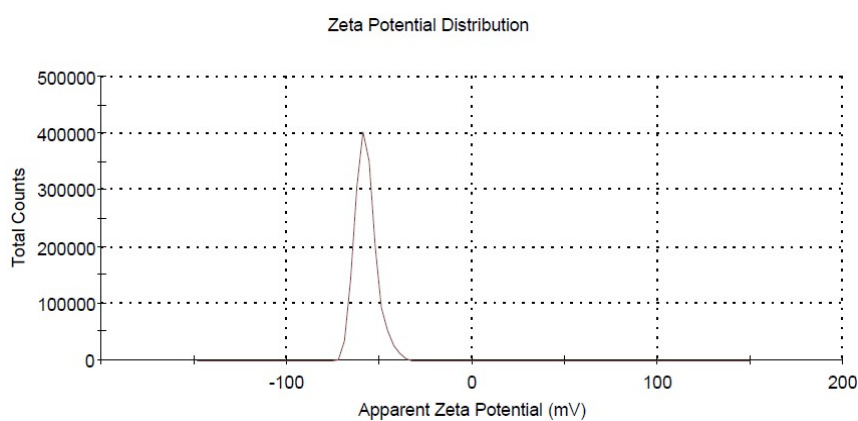

Figure S2. Zeta potential distribution of EDOT emulsion prepared by acoustic emulsification

---

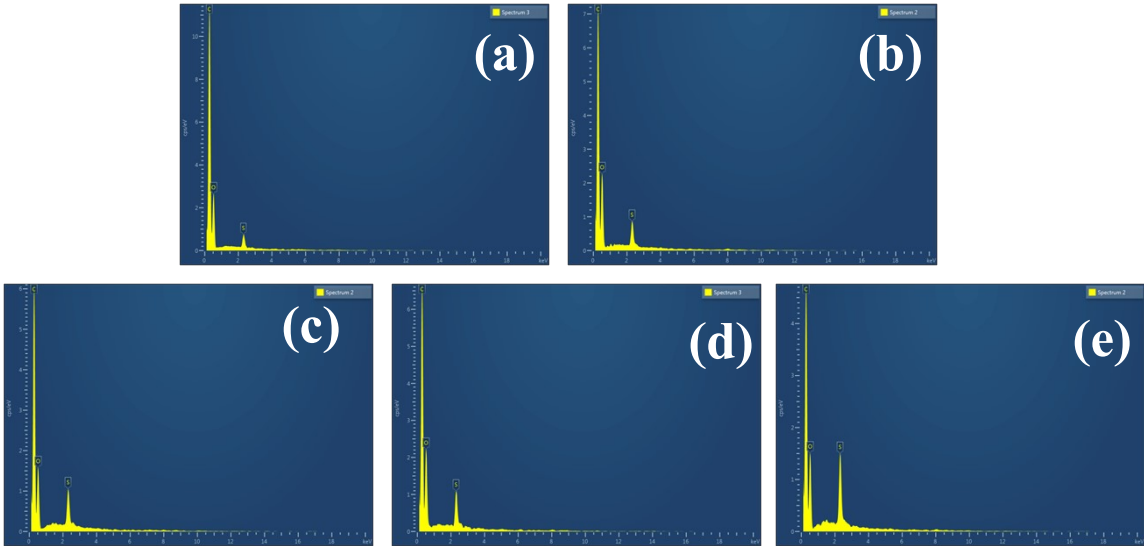

Figure S3. EDX spectra of PMMA-PEDOT composites at different PEDOT loading: (a) 4.38 wt%, (b) 7.08 wt%, (c) 9.77 wt% (d) 10.20 wt% and 16.66 wt%
